# Supplementary material for: Cancer risk among parous women following assisted reproductive technology
Source: PubMed Central journal article supplement — Hum Reprod. 2015 Jun 24;30(8):1952–63. doi: 10.1093/humrep/dev124 (PMC4507330; doi:10.1093/humrep/dev124), 2015-06-24
Supplement: supp_dev124_dev124supp_data.pdf [file supp_dev124_dev124supp_data.pdf]

For cancer of the central nervous system, separate analyses were undertaken for glioma and meningioma, obtained by ICD-O-3 morphology. The codes used are specified below.

### Gliomas

ICD-O-3 codes used:

94213 94003 94103 94113 94203 94503 94513 93823 94013 94403  
94413 94423 79103 93831 93913 93923 93931 93941 93803 93813

93841 94233 94243 94303 94900 95003 95051 95053 95060 95223  
94903.

### Meningiomas

ICD-O-3 codes used:

95300 95301 95303 95310 95320 95330 95340 95350 95360 95370  
95381 95393 75750 75710 75701 75730 95300.
